# Supplementary material
Source: publisher site journal article supplement (https://www.dovepress.com/article/supplementary_file/614120/614120%20Supplementary%20Materials.docx)
Supplement: Supplementary file 1 [file 614120%20Supplementary%20Materials.docx]

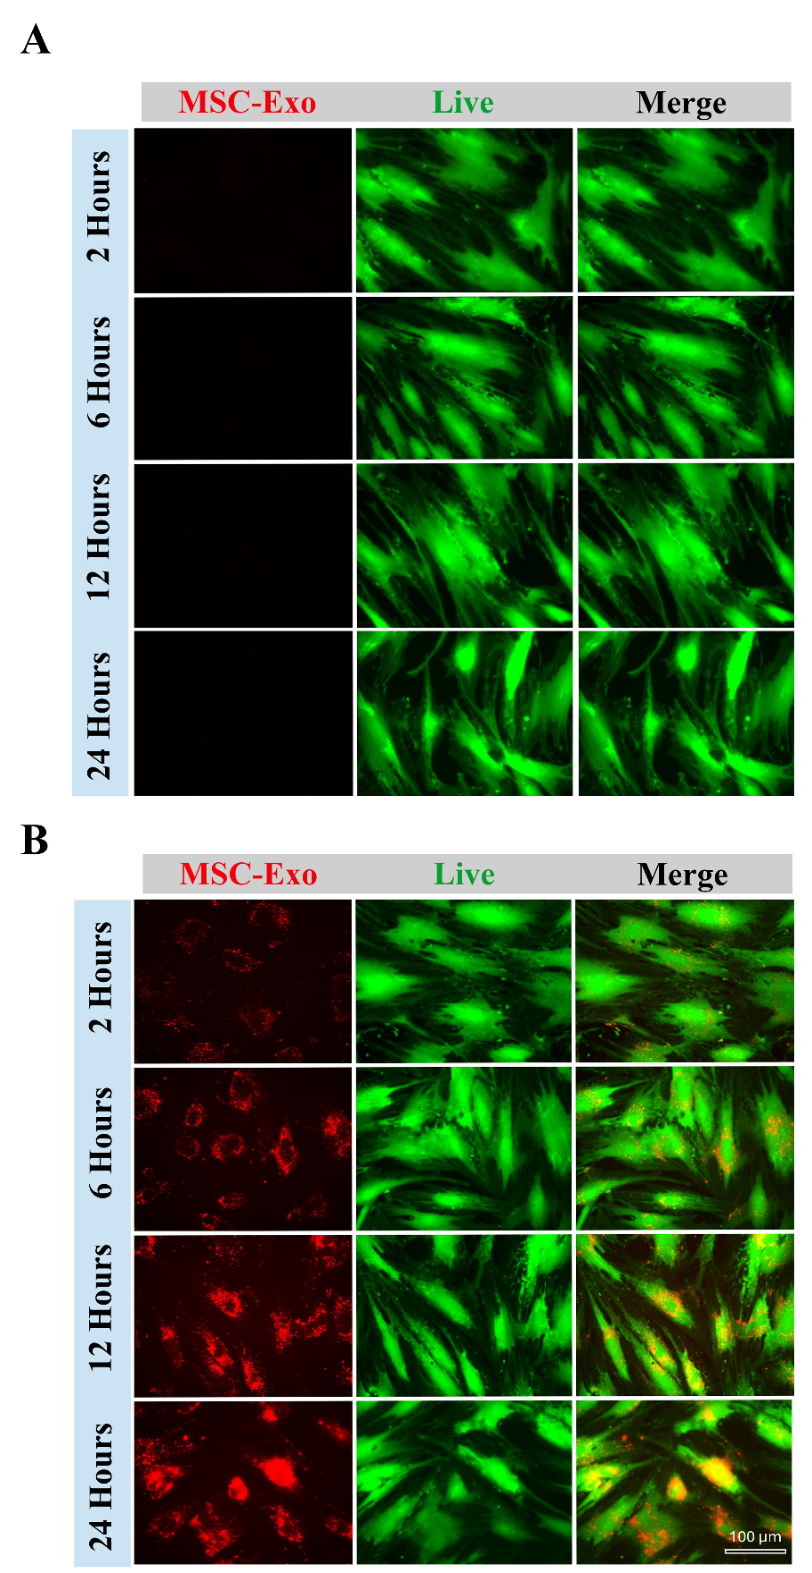


**Supplementary figure 1. MSC-Exo uptake does not induce cytotoxicity in hBMSCs.** (A-B) Representative confocal laser microscopy images of hBSMCs either untreated (A) or treated with MSC-Exos (B), following live/dead cell staining at the indicated time points. Viable cells appear green due to calcein-AM staining, while MSC-Exos are marked by red fluorescence.


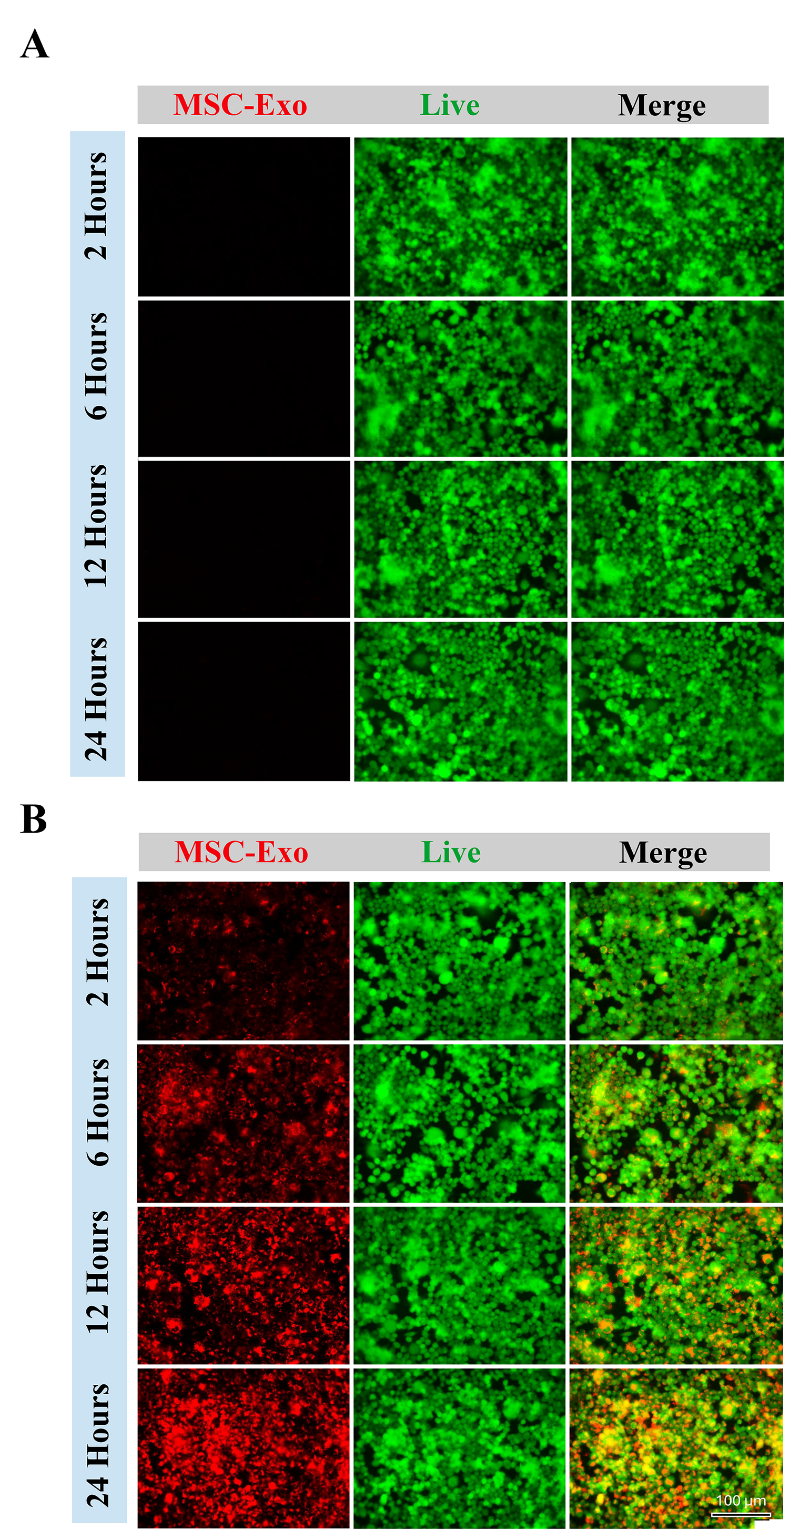


**Supplementary figure 2. MSC-Exo uptake does not induce cytotoxicity in RAW264.7 macrophages.** (A-B) Representative confocal laser microscopy images of RAW264.7 macrophages either untreated (A) or treated with MSC-Exos (B), following live/dead staining at the indicated time points.


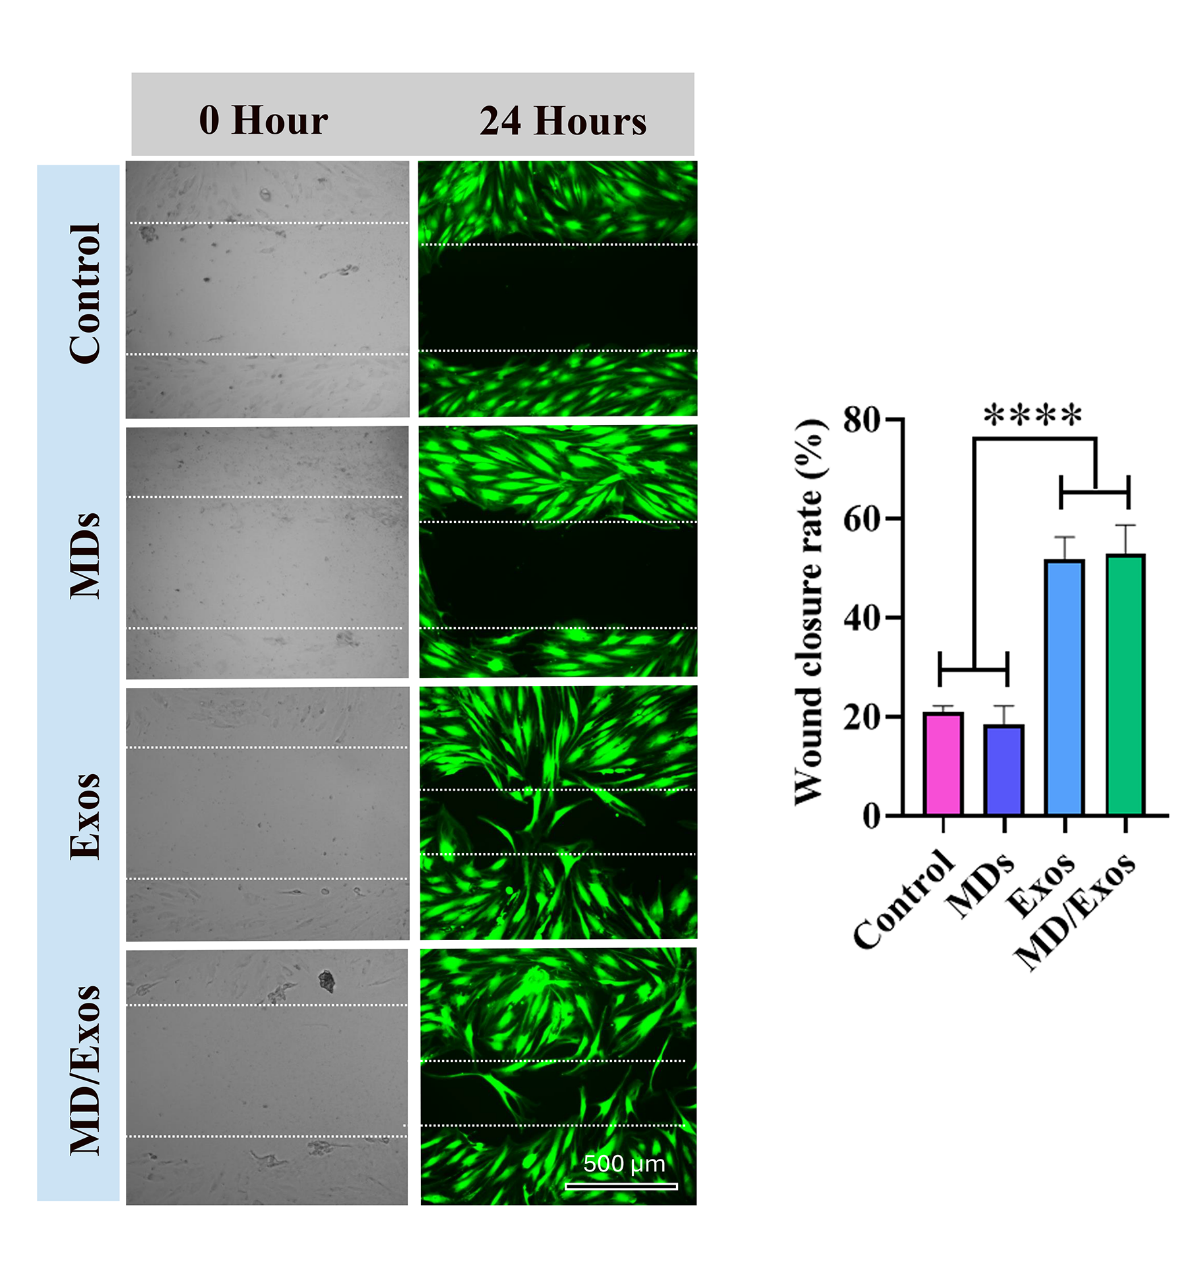


**Supplementary figure 3. Detection of hBMSCs migration using scratch wound assay**. Representative images of hBMSCs treated with or without MD/Exos, as assessed by a scratch wound assay. Following the scratch, cells were incubated for 24 hours, then stained with calcein-AM, a fluorescent dye that labels viable cells. Enhanced wound closure rate was observed in the MD/Exos-treated group, suggesting that MD/Exos promote hBMSC migration. Dotted lines indicate the beginning and end of the scratch wound area at the time of imaging. **Control vs. MD/Exos: ***p* = 0.000034.


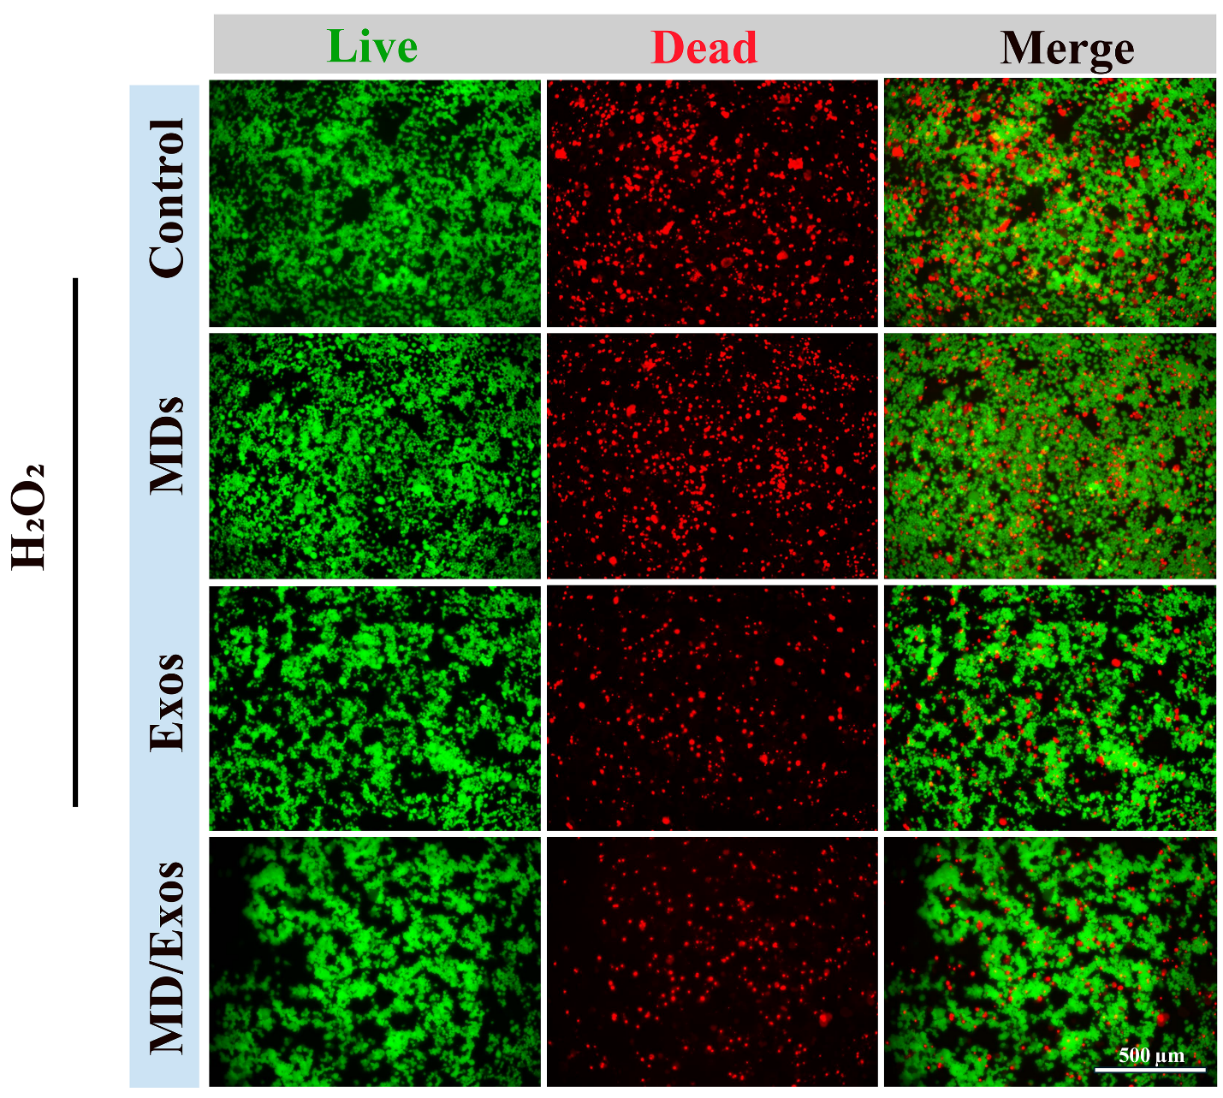


**Supplementary figure 4**. **MD/Exos promote viability of RAW264.7 macrophages following H₂O₂-induced oxidative stress.** Representative images of RAW264.7 macrophages exposed to 400 µM H₂O₂, with or without MD/Exos treatment, followed by live/dead staining. Viable cells are indicated by green fluorescence (calcein-AM), and dead cells by red fluorescence (propidium iodide, PI).


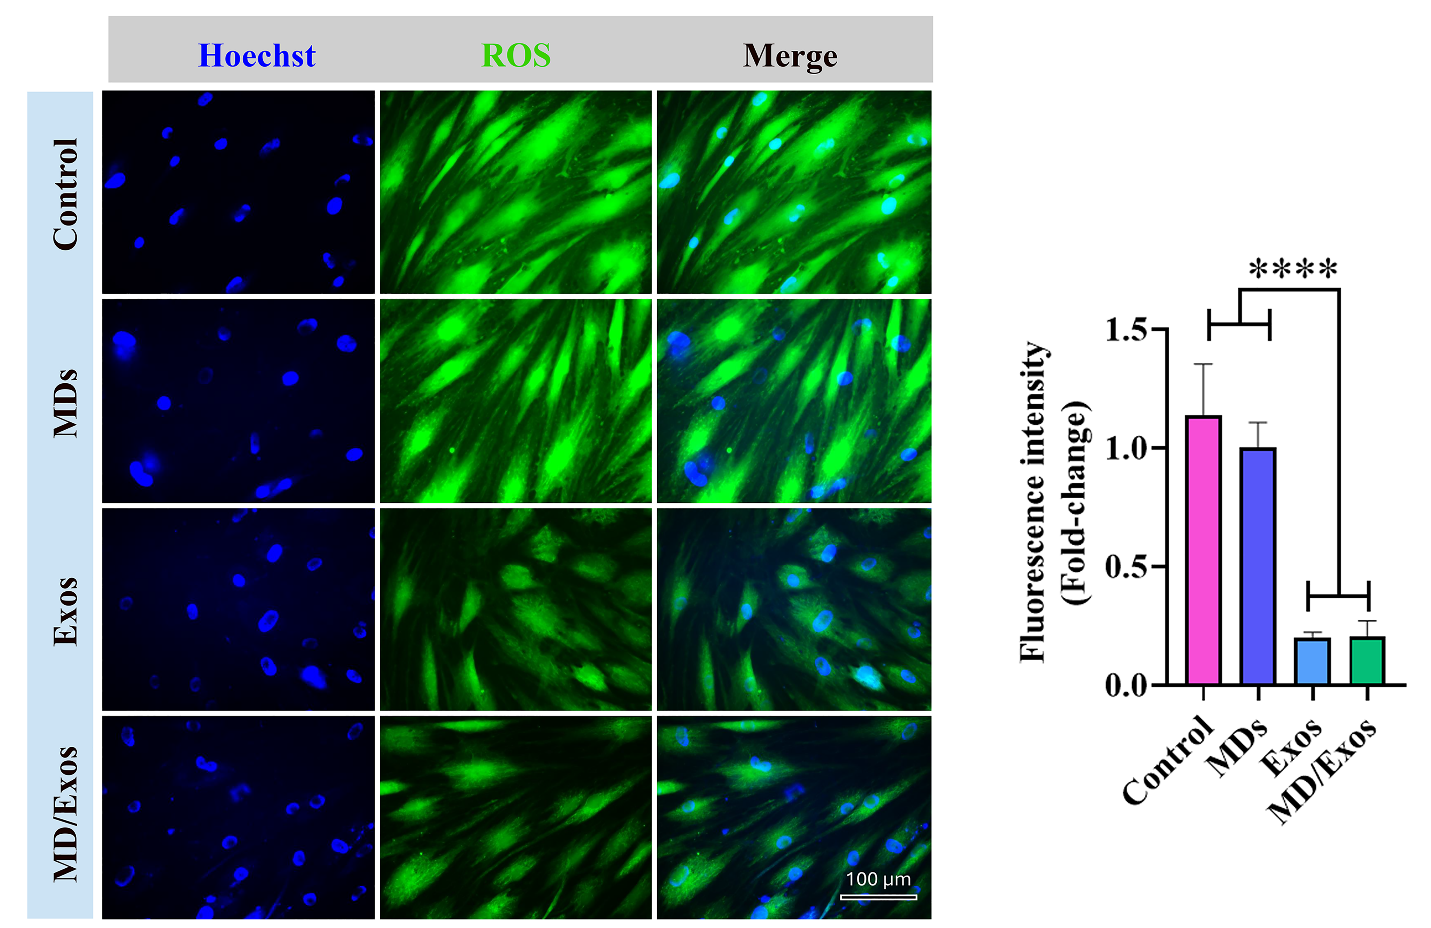


**Supplementary figure 5. Detection of reactive oxygen species (ROS) in hBMSCs by fluorescence staining**. Representative fluorescence microscopy images showing intracellular ROS levels in hBMSCs following exposure to H₂O₂ with or without MD/Exos treatment. Cells were stained with DCFDA/H2DCFDA-Cellular ROS Assay Kit, while nuclei were counterstained with Hoechst 33258. Elevated ROS fluorescence intensity observed in both the control and MDs-treated groups indicates significant oxidative stress, while MD/Exos-treated group showed reduced intensity. Significant difference: *****p* < 0.0001.


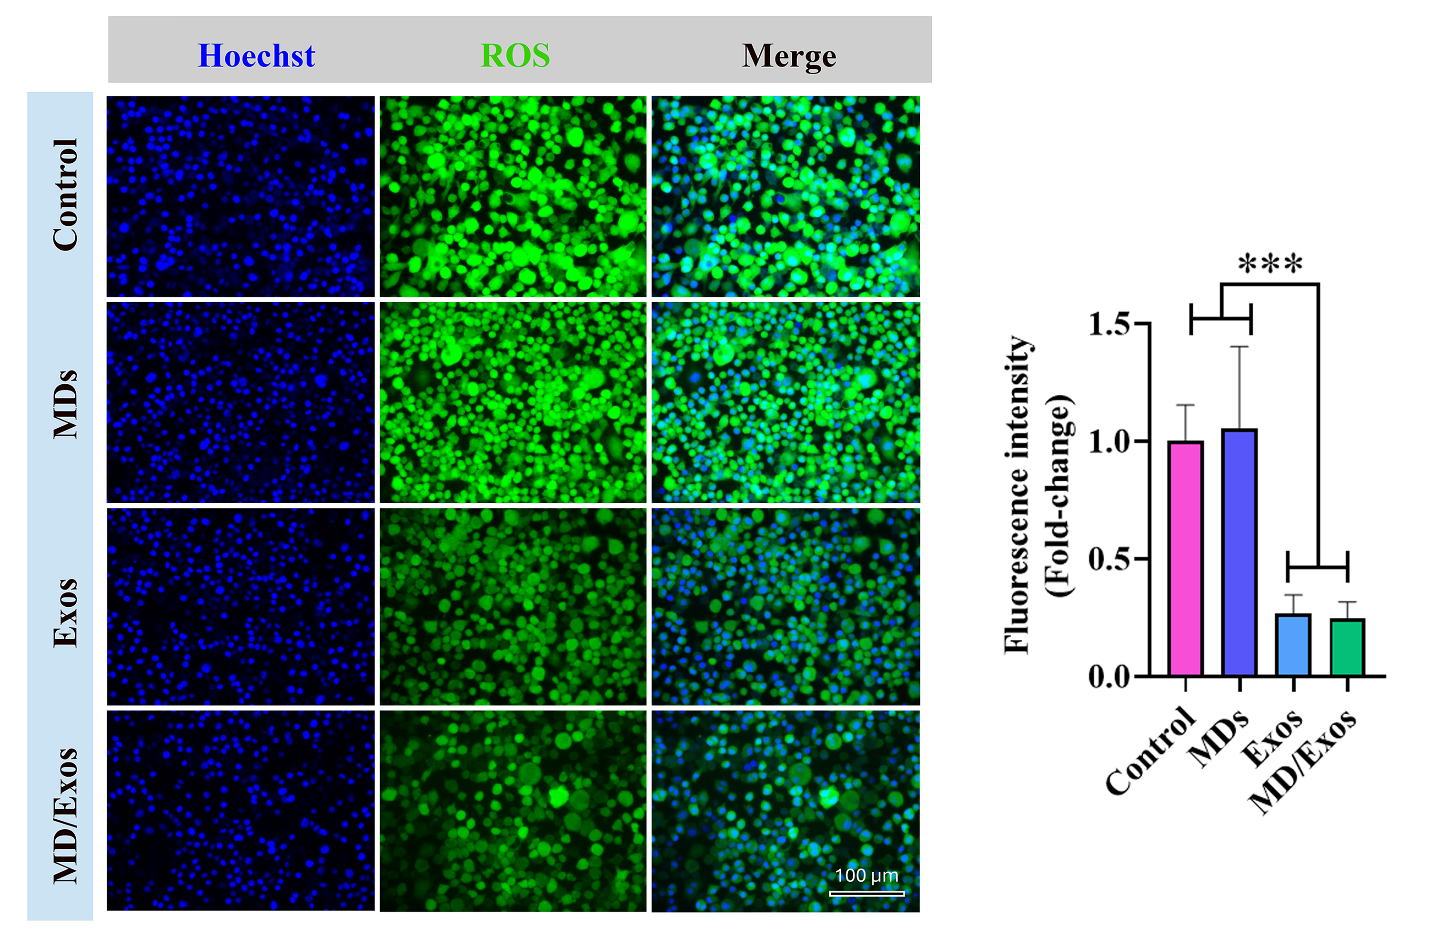


**Supplementary figure. 6 Detection of reactive oxygen species (ROS) in RAW264.7 macrophages by fluorescence staining**. Representative fluorescence microscopy images showing intracellular ROS levels in RAW264.7 macrophages following exposure to H₂O₂ with or without MD/Exos treatment. Cells were stained with DCFDA/H2DCFDA-Cellular ROS Assay Kit, while nuclei were counterstained with Hoechst 33258. Elevated ROS fluorescence intensity observed in both the control and MDs-treated groups indicates significant oxidative stress, while MD/Exos-treated group showed reduced intensity. ***Control vs. MD/Exos: ****p* = 0.0004.


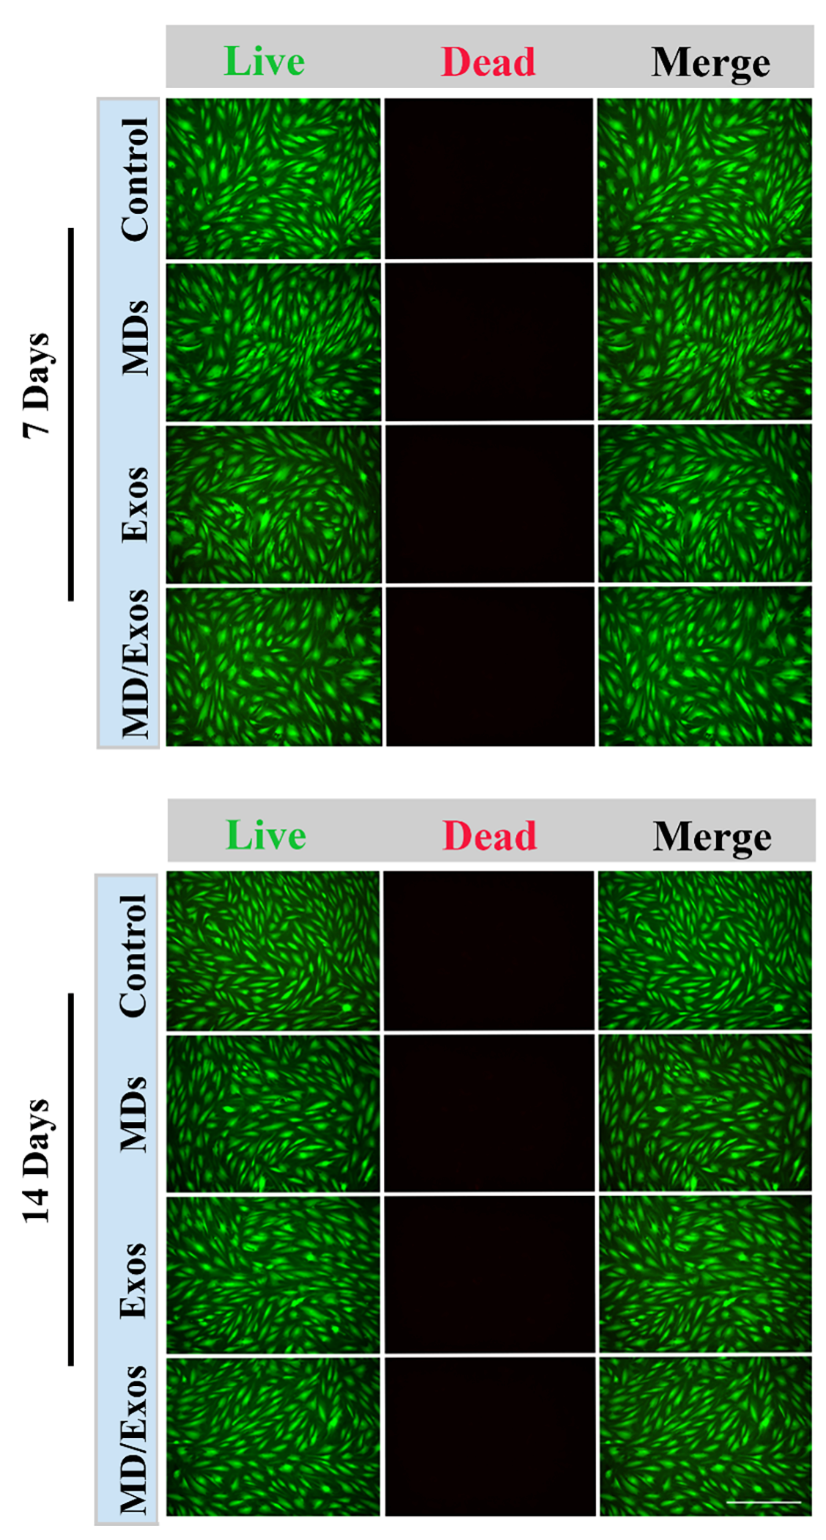


**Supplementary figure 7. Viability assessment of hBMSCs during osteogenic differentiation.** Representative confocal laser microscopy images of hBMSCs treated with or without MD/Exos, following live/dead staining at days 7 and 14 of osteogenic differentiation. Viable cells are indicated by green fluorescence (calcein-AM), while dead cells are labeled in red (propidium iodide, PI). Scale bar = 500 µm.


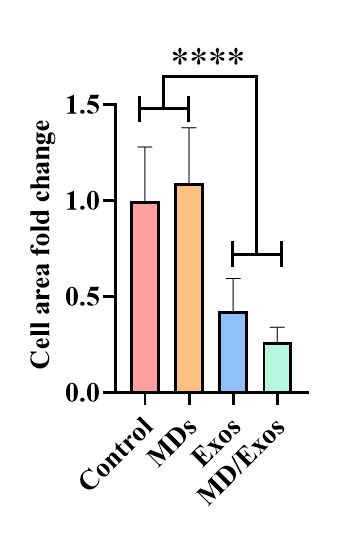


**Supplementary figure 8.** Quantitative analysis of macrophage cell spreading area. Significant difference: *****p* < 0.0001.
